# Supplementary material for: Sulfate encapsulation in three-fold interpenetrated metal–organic frameworks with bis(pyridylurea) ligands
Source: Royal Society of Chemistry journal article supplement (doi:10.1039/b920777e), 2010-01-01
Supplement: b920777e.pdf [file b920777e.pdf]

*Electronic Supplementary Information*

# Sulfate encapsulation in three-fold interpenetrated metal-organic frameworks with bis(pyridylurea) ligands

Biao Wu,\* Jianjun Liang, Yuxin Zhao, Minrui Li, Shaoguang Li, Yanyan Liu, Yongping Zhang, and Xiao-Juan Yang

## Experimental

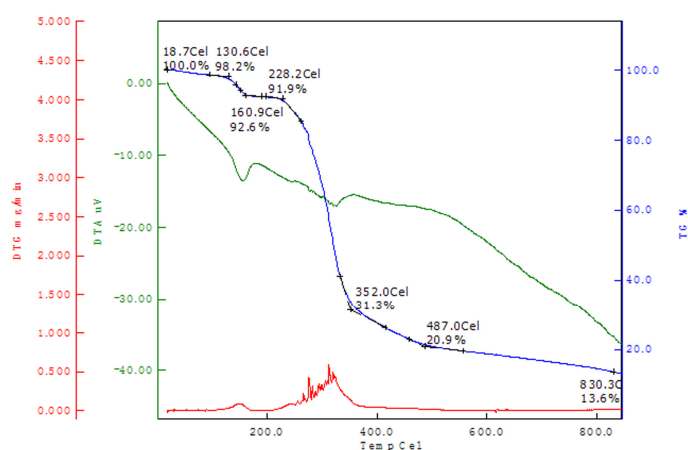

**Figure S1.** TGA curve of compound 1.

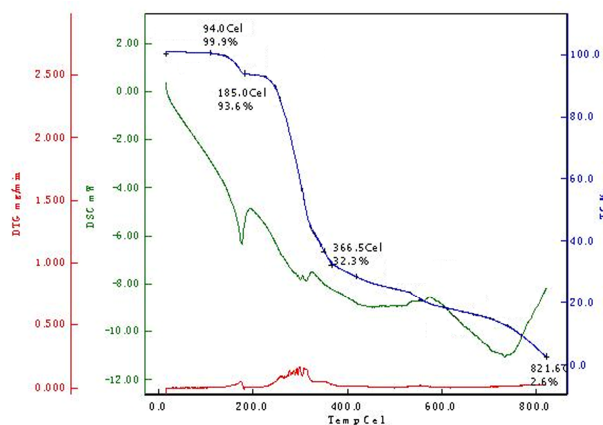

**Figure S2.** TGA curve of compound 2.

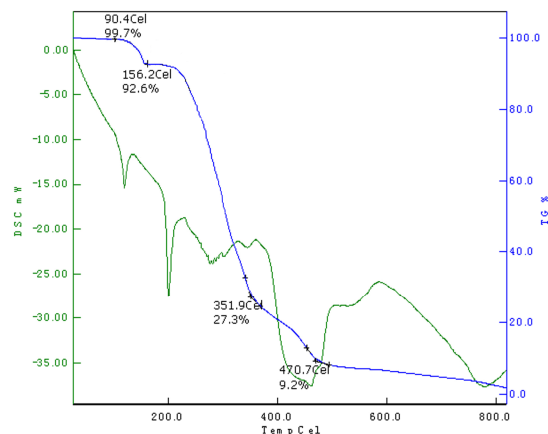

**Figure S3.** TGA curve of compound 3.

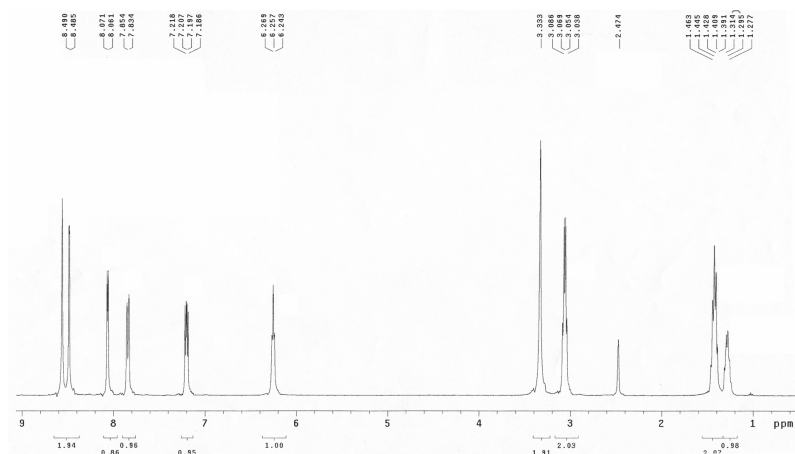

**Figure S4.** <sup>1</sup>H NMR spectrum of L<sup>5</sup>.

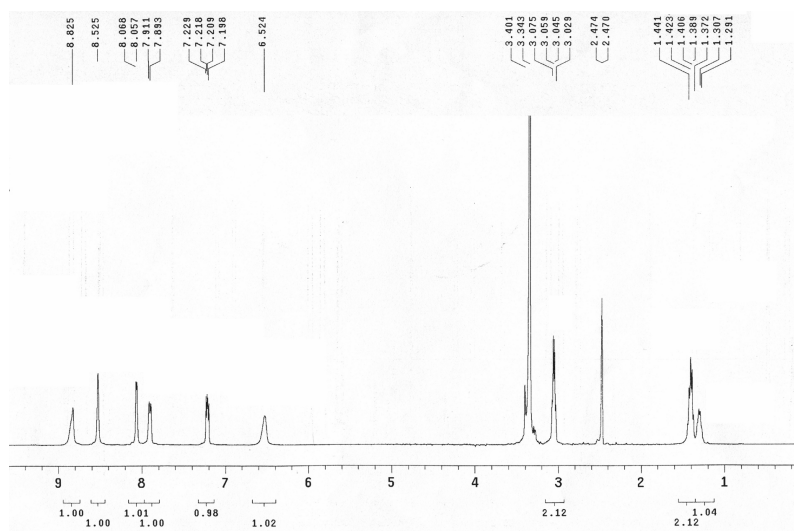

**Figure S5.** <sup>1</sup>H NMR spectrum of 1.

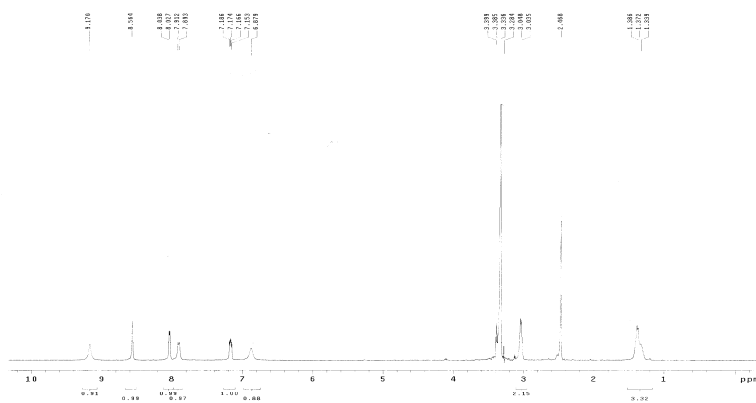

**Figure S6.** <sup>1</sup>H NMR Spectrum of 2.

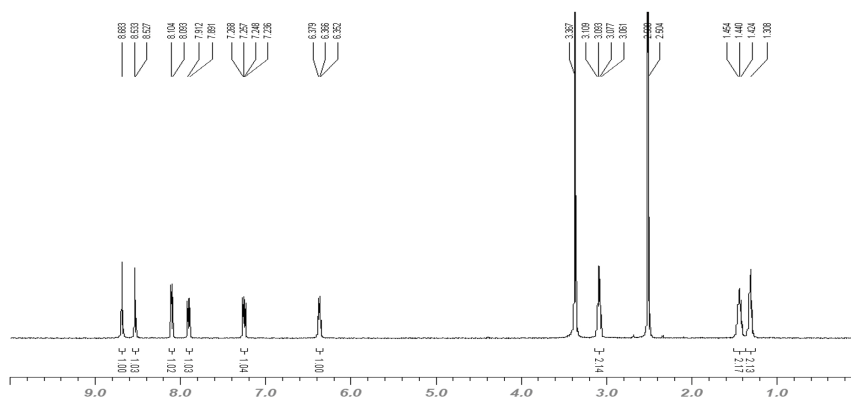

Figure S7.  $^1\text{H}$  NMR spectrum of **3**.

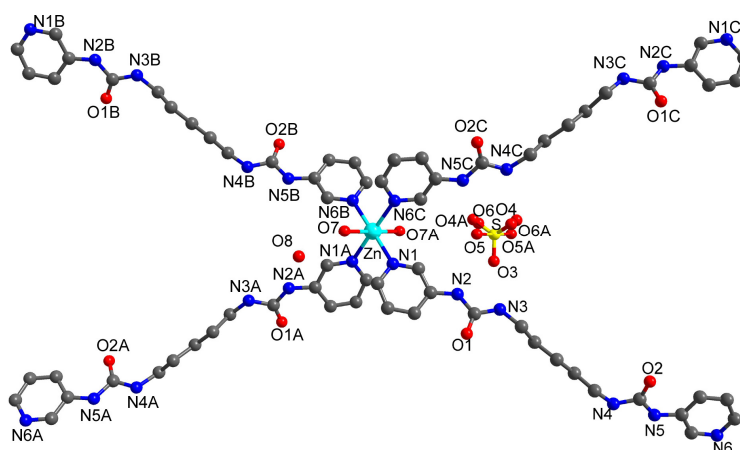

Figure S8. Molecular plot of **1** with atomic labeling. Hydrogen atoms are omitted for clarity. Selected bond lengths (Å) and angles ( $^\circ$ ): Zn–N1, 2.216(1); Zn–N6B,<sup>b</sup> 2.176(1); Zn–O7, 2.127(1); O7–Zn–N1, 88.23(5); N1–Zn–N1A<sup>a</sup>, 84.14(8); N6B<sup>b</sup>–Zn–N6C<sup>c</sup>, 85.56(7); N6C<sup>c</sup>–Zn–N1 95.16(6); O7–Zn–N1A<sup>a</sup> 92.26(5); N6B<sup>b</sup>–Zn–N1 178.64(5); O7–Zn–N6B<sup>b</sup>, 90.63(5); O7–Zn–N6C<sup>c</sup>, 88.89(5). Symmetry code: <sup>a</sup> 1–x, y, 0.5–z, <sup>b</sup> 1.5+x, 0.5+y, 0.5–z; <sup>c</sup> –x–0.5, y+0.5, z.

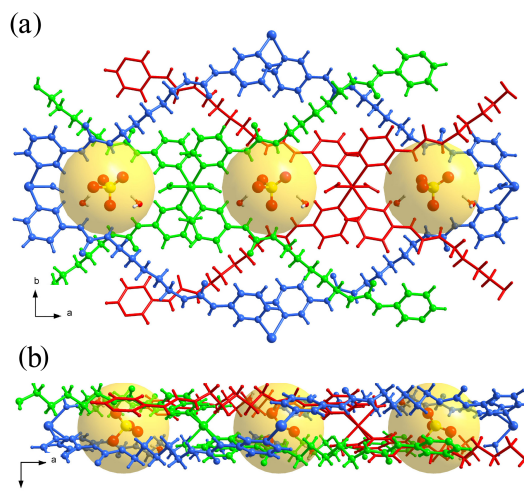

Figure S9. (a) Ellipsoidal cavities in the 3-fold interpenetrated structure of **1** with sulfate ions encapsulated in the cavities; (b) Side view of the interpenetrated bilayer structure of **1**.

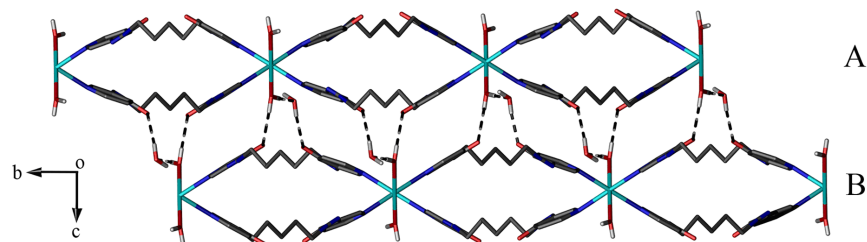

**Figure S10.** The layered structure of **1** packed in a repeating ABAB sequence.

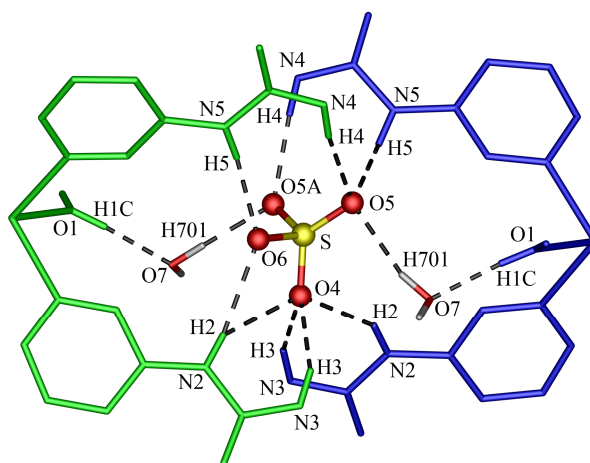

**Figure S11.** Ellipsoidal cavities in the 3-fold interpenetrated structure of **3**. The ligands are color coded to show that each belongs to a different independent network. Symmetry code of sulfate:  $1-x, y, 0.5-z$ ,

**Table S1.** Hydrogen bonding parameters ( $\text{\AA}$ ,  $^\circ$ ) for  $\text{SO}_4^{2-}$  binding by the urea groups in **1**.

| D-H $\cdots$ A                  | H $\cdots$ A | D $\cdots$ A | $\angle$ D-H $\cdots$ A |
|---------------------------------|--------------|--------------|-------------------------|
| N2-H2B $\cdots$ O3              | 2.11         | 2.916(2)     | 156.8                   |
| N3-H3B $\cdots$ O3              | 2.15         | 2.941(3)     | 153.6                   |
| N4-H4A $\cdots$ O6 <sup>a</sup> | 2.14         | 2.906(7)     | 148.2                   |
| N4-H4A $\cdots$ O4              | 2.17         | 3.002(7)     | 164.2                   |
| N5-H5B $\cdots$ O5              | 2.12         | 2.869(4)     | 145.4                   |
| N5-H5B $\cdots$ O4 <sup>a</sup> | 2.14         | 2.962(5)     | 159.7                   |
| N2-H2B $\cdots$ O5              | 2.56         | 3.221(4)     | 134.3                   |

<sup>a</sup> symmetry code:  $x-0.5, y-0.5, 0.5-z$ .

**Table S2.** Hydrogen bonding parameters ( $\text{\AA}$ ,  $^\circ$ ) in **2**.

| D-H $\cdots$ A     | H $\cdots$ A | D $\cdots$ A | $\angle$ D-H $\cdots$ A |
|--------------------|--------------|--------------|-------------------------|
| O7-H7D $\cdots$ O8 | 1.82(3)      | 2.651(3)     | 175(4)                  |
| O7-H7C $\cdots$ O2 | 1.94(3)      | 2.741(3)     | 169(4)                  |
| O8-H8D $\cdots$ O1 | 1.87(3)      | 2.760(3)     | 174(4)                  |

|           |         |           |        |
|-----------|---------|-----------|--------|
| O8–H8C…O4 | 1.97(3) | 2.884(10) | 163(4) |
| O8–H8C…O6 | 1.80(3) | 2.734(12) | 175(4) |
| N2–H2B…O3 | 2.09    | 2.908(3)  | 157.9  |
| N3–H3B…O3 | 2.19    | 2.977(3)  | 152.3  |
| N4–H4A…O4 | 2.19    | 3.036(10) | 168.0  |
| N4–H4A…O6 | 2.11    | 2.890(11) | 150.8  |
| N5–H5B…O5 | 2.10    | 2.872(5)  | 148.3  |

**Table S3.** Hydrogen bonding parameters (Å, °) in **3**.

| D–H…A       | H…A     | D…A       | ∠D–H…A |
|-------------|---------|-----------|--------|
| O1–H1C…O7   | 1.81(2) | 2.646(4)  | 174.6  |
| O7–H701…O5  | 2.11(5) | 2.926(7)  | 161.4  |
| O7–H701…O5A | 1.89(4) | 2.733(12) | 173.4  |
| N2–H2…O4    | 2.31    | 3.071(4)  | 147.7  |
| N2–H2…O6    | 2.32    | 3.114(7)  | 153.8  |
| N3–H3…O4    | 2.11    | 2.905(5)  | 153.2  |
| N4–H4…O5    | 2.08    | 2.929(7)  | 170.2  |
| N4–H4…O5A   | 2.06    | 2.893(12) | 162.9  |
| N5–H5…O5    | 2.34    | 3.084(8)  | 144.7  |
| N5–H5…O6    | 2.10    | 2.937(7)  | 163.5  |

### Anion competitive crystallization experiments

A solution of 68.4 mg (0.2 mmol) of **1** in 10 mL of MeOH was added to an aqueous solution (5 mL) containing ZnSO<sub>4</sub> (0.1 mmol), NaCl (0.2 mmol), NaNO<sub>3</sub> (0.2 mmol), and NaClO<sub>4</sub> (0.2 mmol). The resulting solution was stirred at room temperature and allowed to evaporate slowly. After one week, colorless crystals were collected and washed with water, ethanol and ether. The FT-IR spectrum and powder X-ray diffraction pattern of the product were identical with those of **1**.

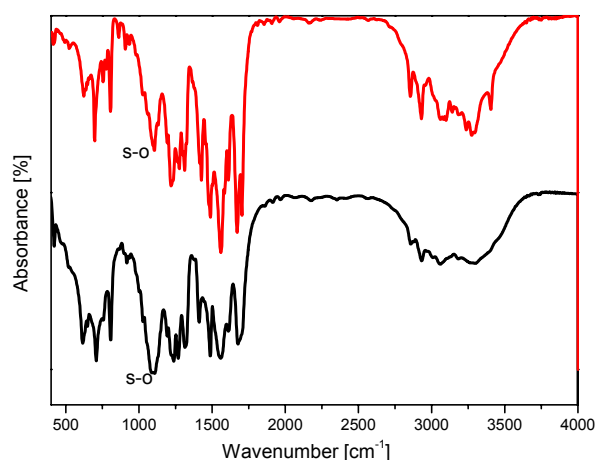

**Figure S12.** FT-IR spectra of **1** (black) and the solid crystallized in the presence of the anionic mixture (red).

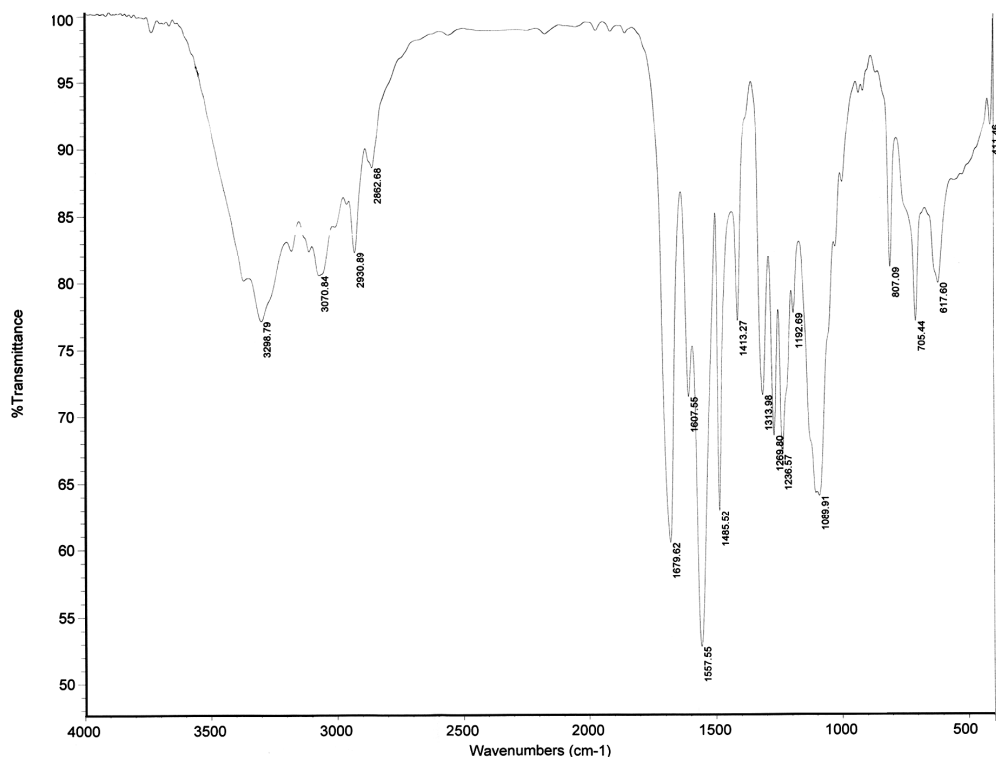

Figure S13. FT-IR spectrum of 2.

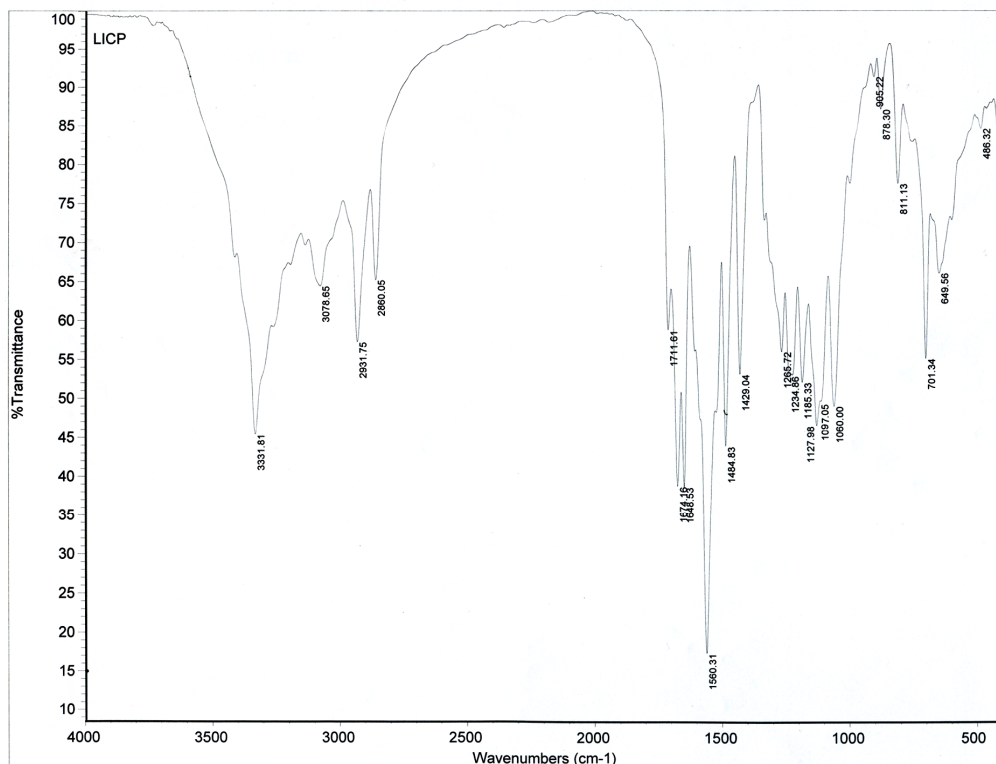

Figure S14. FT-IR spectrum of 3.
